# Supplementary material
Source: publisher figshare collection journal article supplement (https://gsajournals.figshare.com/ndownloader/files/26820917)
Supplement: Supplementary file 1 [file 26820917]

## Sheet: Table S1
Table S1 DESeq2 output and the FPKM values of genes
Gene_ID	Symbol	description	AAV-scamble1_count	AAV-scamble2_count	AAV-scamble3_count	AAV-shBrpf1-1_count	AAV-shBrpf1-2_count	AAV-shBrpf1-3_count	Mean_AAV-scramble_count	Mean_AAV-shBrpf1_count	AAV-shBrpf1_vs_AAV-scramble_log2FoldChange	AAV-shBrpf1_vs_AAV-scramble_P value	AAV-scramble1_FPKM	AAV-scramble2_FPKM	AAV-scramble3_FPKM	AAV-shBrpf1-1_FPKM	AAV-shBrpf1-2_FPKM	AAV-shBrpf1-3_FPKM
ENSMUSG00000109061	Map2k7	mitogen-activated protein kinase kinase 7	7.60721	5.84947	8.01932	3.80487	4.38708	6.15529	7.15866	4.78241	-2.37625	0.00131914	2.22081	0.470705	2.72866	0.139243	0.162528	0.754464
ENSMUSG00000103037	Pcdhgb1	protocadherin gamma subfamily B, 1	8.18182	10.059	9.1709	10.3127	10.0331	13.1405	9.13725	11.1621	2.02483	0.0392046	1.6421	4.44315	3.00951	6.99533	4.48357	48.6986
ENSMUSG00000098754	Prn	prion protein readthrough transcript	4.32771	3.29158	2.30797	0	0	0	3.30909	0	-3.30909	0.0118065	0.176187	0.056241	0.028551	0	0	0
ENSMUSG00000098387	Pet117	PET117 homolog	1.04266	0.983221	0.840257	0.85678	9.01538	7.48454	0.955378	5.78557	4.83019	0.00104295	1.4e-05	4.3e-05	0.004256	0.004862	18.4841	7.98071
ENSMUSG00000096549	Prickle4	prickle planar cell polarity protein 4	3.66223	5.72176	5.57385	1.77946	3.7291	2.76041	4.98595	2.75632	-2.22962	0.00560375	0.195579	0.620589	0.694733	0.0304177	0.143718	0.0801403
ENSMUSG00000093445	Lrch4	leucine-rich repeats and calponin homology (CH) domain containing 4	4.24947	4.8254	5.66656	3.52893	8.69628	6.79106	4.91381	6.33876	1.42495	0.00762844	0.134518	0.157414	0.379282	0.0785955	2.61266	0.861588
ENSMUSG00000079428	Tceal7	transcription elongation factor A (SII)-like 7	3.24491	3.66931	3.39018	3.80487	5.29701	5.33873	3.4348	4.81354	1.37874	0.0276727	0.231158	0.225805	0.22575	0.3329	0.75214	0.988502
ENSMUSG00000078713	Tomm5	translocase of outer mitochondrial membrane 5 homolog (yeast)	9.55361	7.78018	7.53874	9.4893	10.2411	9.59261	8.29084	9.77432	1.48348	0.0143836	28.4513	6.03466	6.41374	26.3011	34.5483	27.6866
ENSMUSG00000074570	Cass4	Cas scaffolding protein family member 4	4.07897	2.29499	3.1544	4.23587	5.68863	5.19448	3.17612	5.03966	1.86354	0.0136421	0.0969062	0.0114039	0.035976	0.102109	0.22552	0.205802
ENSMUSG00000071724	Smpd5	sphingomyelin phosphodiesterase 5	2.65537	3.55405	1.75322	0	0	0	2.65421	0	-2.65421	0.0462203	0.0681555	0.104697	0.0325791	0	0	0
ENSMUSG00000068270	Shroom4	shroom family member 4	6.82479	6.27046	6.92048	5.34832	5.05245	6.26771	6.67191	5.55616	-1.11575	0.0283564	0.414196	0.202624	0.407862	0.140031	0.0858575	0.265005
ENSMUSG00000066058	Cldn19	claudin 19	2.06352	2.29499	3.39018	2.73919	5.50607	4.34006	2.58289	4.1951	1.61221	0.0401717	0.0225159	0.017051	0.0622251	0.0364238	0.249352	0.140737
ENSMUSG00000062157	Ifnlr1	interferon lambda receptor 1	0	0	0	2.55236	3.7291	2.53934	0	2.94027	2.94027	0.0238491	0	0	0	0.035486	0.069774	0.028857
ENSMUSG00000061311	Rag1	recombination activating gene 1	2.65537	3.55405	4.48155	1.77946	0	1.95901	3.56366	1.24616	-2.3175	0.0328633	0.021204	0.035853	0.094379	0.007833	0	0.009131
ENSMUSG00000053158	Fes	feline sarcoma oncogene	4.88852	4.77482	2.70765	3.05292	0	0	4.12366	1.01764	-3.10602	0.0340643	0.173174	0.122466	0.0283497	0.0406748	0	0
ENSMUSG00000053004	Hrh1	histamine receptor H1	3.77823	2.77847	3.1544	6.77706	3.88689	7.15491	3.23703	5.93962	2.70259	0.000126119	0.08642	0.0296168	0.0488638	0.775745	0.0686798	0.988189
ENSMUSG00000051550	Zfp579	zinc finger protein 579	7.79794	8.99422	8.18911	8.70123	10.1946	9.47263	8.32709	9.45617	1.12908	0.0082339	1.72318	2.93651	2.09999	3.15955	6.95309	5.29912
ENSMUSG00000050103	Agmo	alkylglycerol monooxygenase	3.53607	0	4.31968	0	0	0	2.61858	0	-2.61858	0.0467613	0.0492517	0	0.0898468	0	0	0
ENSMUSG00000049580	Tsku	tsukushi, small leucine rich proteoglycan	6.23268	5.92099	5.68884	7.64164	7.86061	8.31157	5.94751	7.93794	1.99044	9.57e-08	0.767222	0.450019	0.473078	2.06618	1.87405	3.21192
ENSMUSG00000047686	Zcchc5	zinc finger, CCHC domain containing 5	4.24947	1.56255	1.75322	0	0	0	2.52175	0	-2.52175	0.0467007	0.190355	0.015168	0.016319	0	0	0
ENSMUSG00000045087	S1pr5	sphingosine-1-phosphate receptor 5	5.29133	4.13807	5.16093	3.52893	3.11487	2.95206	4.86344	3.19862	-1.66482	0.011587	0.490971	0.152316	0.413106	0.124493	0.060771	0.074991
ENSMUSG00000043017	Ptgir	prostaglandin I receptor (IP)	2.65537	3.29158	2.30797	0	0	0	2.75164	0	-2.75164	0.0412857	0.0420969	0.0568006	0.0288588	0	0	0
ENSMUSG00000042286	Stab1	stabilin 1	1.64156	0	1.36778	2.55236	4.38708	2.76041	1.00312	3.23328	2.23017	0.0427181	0.00682108	0	0.00467593	0.0123487	0.0445235	0.017595
ENSMUSG00000041966	Dcaf17	DDB1 and CUL4 associated factor 17	8.18708	8.56252	7.82181	9.25471	8.36855	10.0139	8.19047	9.21239	1.02192	0.00715691	0.971004	0.925268	0.689913	1.97588	0.826867	3.28335
ENSMUSG00000040364	Sec1	secretory blood group 1	0	0	1.36778	1.77946	5.29701	2.53934	0.455928	3.20527	2.74934	0.0214469	0	0	0.019348	0.021024	0.370384	0.048616
ENSMUSG00000038745	Nlrp6	NLR family, pyrin domain containing 6	4.24947	5.28903	4.62709	3.62689	3.55191	3.27259	4.72186	3.4838	-1.23806	0.0472685	0.110491	0.17932	0.138073	0.0701781	0.0449755	0.0474244
ENSMUSG00000038276	Asic3	acid-sensing (proton-gated) ion channel 3	4.47251	3.87541	3.7704	1.77946	0	2.27816	4.03944	1.35254	-2.6869	0.0116357	0.272469	0.13048	0.14784	0.026553	0	0.047385
ENSMUSG00000037225	Fgf2	fibroblast growth factor 2	4.24947	2.55689	6.41902	6.84987	6.33442	6.81592	4.40846	6.66674	2.25828	0.0494794	0.0714363	0.0129661	0.371953	0.532578	0.285712	0.503158
ENSMUSG00000036832	Lpar3	lysophosphatidic acid receptor 3	2.65537	2.55689	3.49503	0	0	0	2.90243	0	-2.90243	0.0304533	0.05696	0.038397	0.116953	0	0	0
ENSMUSG00000033306	Lpp	LIM domain containing preferred translocation partner in lipoma	9.08393	8.00529	9.45707	8.71243	6.49011	6.26771	8.84876	7.15675	-1.69202	0.0243698	0.805614	0.278792	0.962101	0.601933	0.0997472	0.105163
ENSMUSG00000032384	Csnk1g1	casein kinase 1, gamma 1	9.48271	9.37992	9.88974	8.92714	7.77235	8.67992	9.58412	8.4598	-1.12432	0.00336148	1.49166	1.01865	1.82896	0.980034	0.340605	0.809667
ENSMUSG00000031163	Glod5	glyoxalase domain containing 5	3.24491	3.55405	3.39018	4.56729	4.83728	4.80499	3.39638	4.73652	1.34014	0.0327351	0.403968	0.382568	0.423624	1.05803	1.00669	1.21241
ENSMUSG00000028527	Ak4	adenylate kinase 4	8.67633	9.64752	9.87402	6.1111	9.13426	6.70049	9.39929	7.31528	-2.08401	0.0154208	2.88041	4.15492	6.09384	0.456881	2.9769	0.681043
ENSMUSG00000027684	Mecom	MDS1 and EVI1 complex locus	1.64156	2.97051	2.30797	4.41107	5.68863	2.95206	2.30668	4.35059	2.04391	0.0118093	0.00454371	0.0107571	0.00774262	0.0477997	0.0981097	0.0145183
ENSMUSG00000027401	Tgm3	transglutaminase 3, E polypeptide	4.07897	4.87427	4.80077	2.90457	2.83399	3.27259	4.58467	3.00372	-1.58096	0.0208006	0.124884	0.159933	0.195686	0.04803	0.036497	0.058322
ENSMUSG00000026857	Ntmt1	N-terminal Xaa-Pro-Lys N-methyltransferase 1	7.53483	8.97474	9.0077	8.99521	9.86309	9.72322	8.50576	9.52717	1.02142	0.028997	2.11776	4.30962	5.52645	5.77133	8.21581	9.38253
ENSMUSG00000025997	Ikzf2	IKAROS family zinc finger 2	5.96535	6.44236	5.2831	8.12918	6.12861	8.08994	5.89693	7.44924	1.55231	0.00164686	0.169997	0.175465	0.0952697	0.759088	0.143563	0.723215
ENSMUSG00000022479	Vdr	vitamin D (1,25-dihydroxyvitamin D3) receptor	2.65537	1.97476	0	3.80487	5.77192	1.54858	1.54338	3.70845	2.16508	0.0353624	0.0247999	0.00838653	0	0.0642763	0.229346	0.0105739
ENSMUSG00000020907	Rcvrn	recoverin	4.40193	4.13807	3.2771	2.55236	2.48486	1.54858	3.93903	2.19527	-1.74376	0.0404381	0.61935	0.364937	0.242318	0.135178	0.073407	0.049179
ENSMUSG00000020088	Sar1a	secretion associated Ras related GTPase 1A	11.8226	11.786	12.0764	9.77889	10.4001	10.4657	11.895	10.2149	-1.68012	4.61e-08	31.8804	22.7824	34.9705	7.46167	8.93794	11.7601
ENSMUSG00000017817	Jph2	junctophilin 2	4.72467	5.77421	4.00153	3.71862	0	3.12121	4.83347	2.27994	-2.55353	0.0213456	0.196107	0.300114	0.101757	0.0853492	0	0.0540473
ENSMUSG00000013878	Rnf170	ring finger protein 170	7.51824	6.37604	6.65229	9.34384	7.94379	6.9228	6.84886	8.07014	1.22128	0.00902059	0.946944	0.304553	0.46935	3.29278	0.961689	0.58349
ENSMUSG00000006463	Zdhhc24	zinc finger, DHHC domain containing 24	7.50146	7.7673	7.70097	8.59025	9.50671	9.01127	7.65658	9.03608	1.3795	2.66e-05	2.01896	1.78102	2.12908	4.17966	6.15276	5.48321
ENSMUSG00000005936	Kctd20	potassium channel tetramerisation domain containing 20	11.1945	10.1135	10.0162	11.6618	12.2619	11.8931	10.4414	11.939	1.49753	0.000220087	9.85871	3.40436	3.99255	13.1906	15.5566	15.1534
ENSMUSG00000004233	Wars2	tryptophanyl tRNA synthetase 2 (mitochondrial)	7.91028	7.74776	7.56306	5.40465	7.24027	7.16462	7.74037	6.60318	-1.13719	0.0478077	1.30825	0.859591	0.95008	0.215209	0.619562	0.73291
ENSMUSG00000004031	Brinp2	bone morphogenic protein/retinoic acid inducible neural-specific 2	10.0584	11.0955	10.9782	11.397	12.065	11.9723	10.7107	11.8114	1.10071	0.00313676	3.99379	6.01827	6.96196	9.78776	12.1033	14.2816
